# Supplementary material for: Inter-Individual Differences in the Oral Bacteriome Are Greater than Intra-Day Fluctuations in Individuals
Source: PubMed Central journal article supplement (PMC4487993; doi:10.1371/journal.pone.0131607), 2015-06-29
Supplement: pone.0131607.s004.pdf [file pone.0131607.s004.pdf]

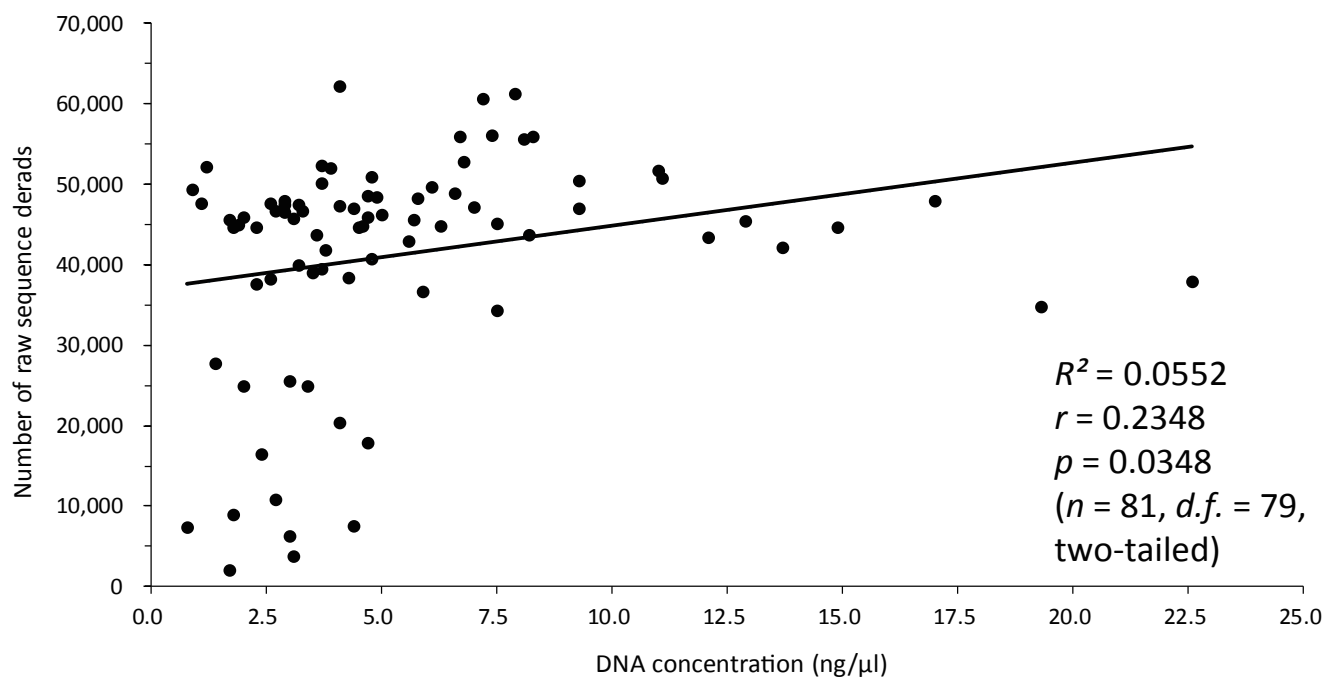

**Correlation between sample DNA concentration and number of usable sequence reads**
